# Supplementary material for: SourceSet: A graphical model approach to identify primary genes in perturbed biological pathways
Source: PubMed Central journal article supplement (PMC6834292; doi:10.1371/journal.pcbi.1007357), 2019-10-25

score

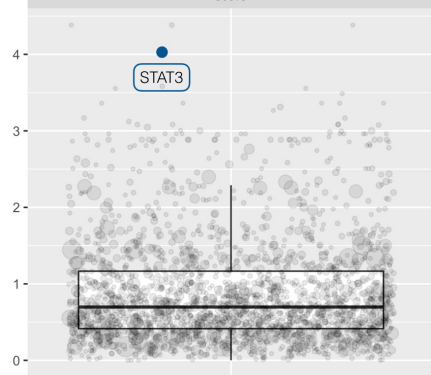

relevance

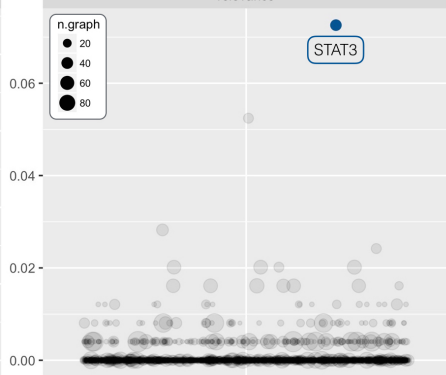

score

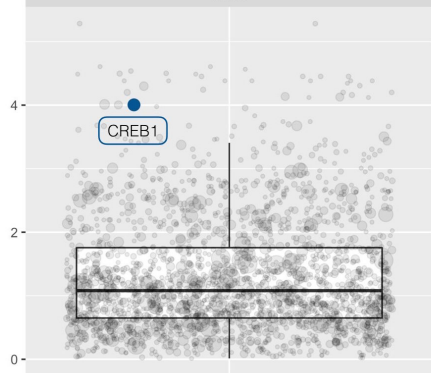

relevance

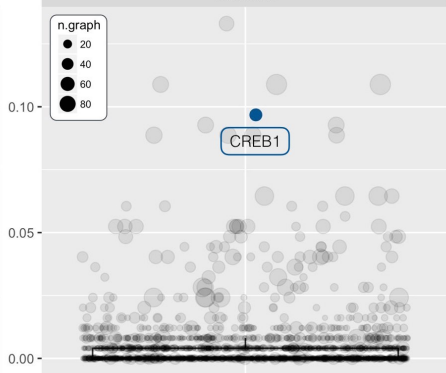

Supplement: pcbi.1007357.s010.pdf [file pcbi.1007357.s010.pdf]
