# Supplementary material for: SourceSet: A graphical model approach to identify primary genes in perturbed biological pathways
Source: PubMed Central journal article supplement (PMC6834292; doi:10.1371/journal.pcbi.1007357), 2019-10-25

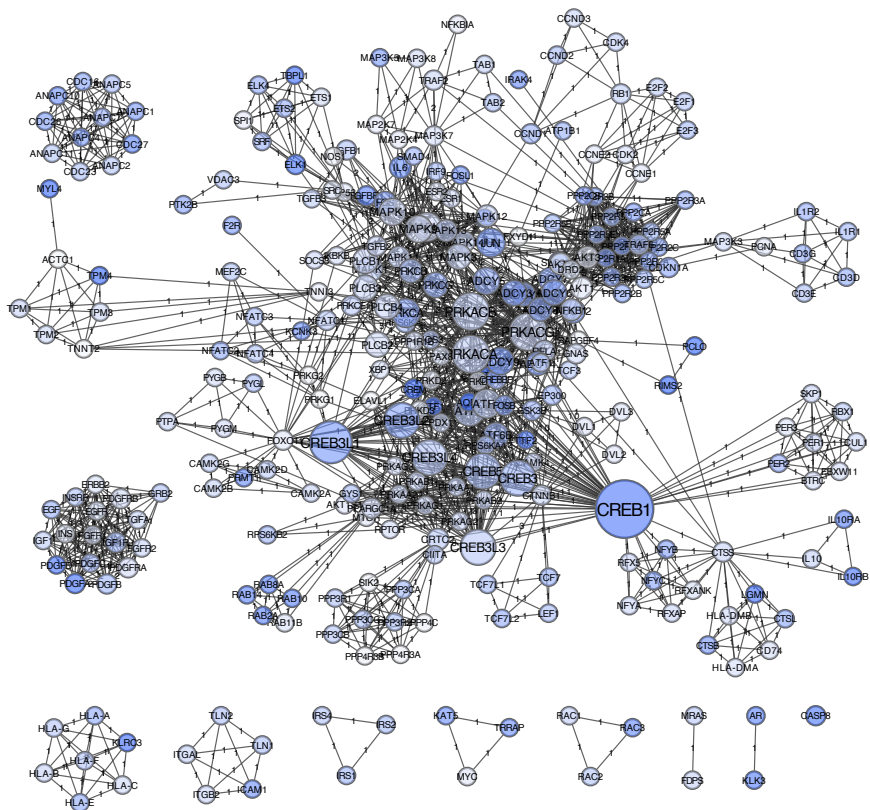

Supplement: pcbi.1007357.s012.pdf [file pcbi.1007357.s012.pdf]
