# Supplementary material for: SourceSet: A graphical model approach to identify primary genes in perturbed biological pathways
Source: PubMed Central journal article supplement (PMC6834292; doi:10.1371/journal.pcbi.1007357), 2019-10-25
Supplement: pcbi.1007357.s014.pdf [file pcbi.1007357.s014.pdf]

|                                      | $ \hat{D}_G $ | $ \hat{D}_G \setminus \hat{D}_G $ | $ V $ | n.cluster | primary impact | total impact | pvalue |
|--------------------------------------|---------------|-----------------------------------|-------|-----------|----------------|--------------|--------|
| ★ Acute myeloid leukemia             | 5             | 9                                 | 55    | 1         | 0.091          | 0.255        | <0.001 |
| ★ Adipocytokine signaling pathway    | 1             | 27                                | 62    | 1         | 0.016          | 0.452        | <0.001 |
| ★ AGE-RAGE signaling pathway ...     | 1             | 14                                | 87    | 1         | 0.011          | 0.172        | <0.001 |
| ★ EGFR tyrosine kinase inhibitor ... | 6             | 20                                | 79    | 1         | 0.076          | 0.329        | <0.001 |
| ★ Epstein-Barr virus infection       | 14            | 12                                | 81    | 7         | 0.173          | 0.321        | <0.001 |
| ★ FoxO signaling pathway             | 0             | 37                                | 120   | 2         | 0.000          | 0.308        | <0.001 |
| ★ Hepatitis B                        | 8             | 4                                 | 129   | 4         | 0.062          | 0.093        | <0.001 |
| ★ HIF-1 signaling pathway            | 3             | 12                                | 97    | 1         | 0.031          | 0.155        | <0.001 |
| ★ Inflammatory bowel disease (IBD)   | 3             | 9                                 | 47    | 1         | 0.064          | 0.255        | <0.001 |
| ★ Insulin resistance                 | 3             | 18                                | 91    | 1         | 0.033          | 0.231        | <0.001 |
| ★ Measles                            | 3             | 0                                 | 99    | 9         | 0.030          | 0.030        | <0.001 |
| ★ MicroRNAs in cancer                | 9             | 0                                 | 136   | 136       | 0.066          | 0.066        | <0.001 |
| ★ Non-small cell lung cancer         | 2             | 0                                 | 56    | 2         | 0.036          | 0.036        | <0.001 |
| ★ Pancreatic cancer                  | 4             | 15                                | 62    | 4         | 0.065          | 0.306        | <0.001 |
| ★ Pathways in cancer                 | 0             | 9                                 | 304   | 3         | 0.000          | 0.030        | <0.001 |
| ★ Prolactin signaling pathway        | 4             | 35                                | 70    | 1         | 0.057          | 0.557        | 0.001  |
| ★ Proteoglycans in cancer            | 8             | 44                                | 195   | 3         | 0.041          | 0.267        | <0.001 |
| ★ Signaling pathways regulating ...  | 1             | 14                                | 107   | 1         | 0.009          | 0.140        | <0.001 |
| ★ Th17 cell differentiation          | 1             | 38                                | 90    | 2         | 0.011          | 0.433        | <0.001 |
| ★ Toxoplasmosis                      | 3             | 6                                 | 87    | 6         | 0.034          | 0.103        | <0.001 |
