# Supplementary material for: SourceSet: A graphical model approach to identify primary genes in perturbed biological pathways
Source: PubMed Central journal article supplement (PMC6834292; doi:10.1371/journal.pcbi.1007357), 2019-10-25
Supplement: pcbi.1007357.s015.pdf [file pcbi.1007357.s015.pdf]

|   |                                     | $ \hat{D}_G $ | $ \hat{D}_G \setminus \hat{D}_G $ | $ V $ | n.cluster | primary impact | total impact | pvalue |
|---|-------------------------------------|---------------|-----------------------------------|-------|-----------|----------------|--------------|--------|
| * | Adrenergic signaling in cardio...   | 16            | 68                                | 144   | 1         | 0.111          | 0.583        | <0.001 |
| * | Aldosterone synthesis and secretion | 34            | 17                                | 65    | 2         | 0.523          | 0.785        | <0.001 |
| * | Amphetamine addiction               | 13            | 21                                | 62    | 2         | 0.210          | 0.548        | <0.001 |
| * | AMPK signaling pathway              | 29            | 15                                | 94    | 3         | 0.309          | 0.468        | <0.001 |
| * | Antigen processing and presentation | 16            | 0                                 | 62    | 4         | 0.258          | 0.258        | <0.001 |
| * | cAMP signaling pathway              | 18            | 60                                | 193   | 1         | 0.093          | 0.404        | <0.001 |
| * | cGMP-PKG signaling pathway          | 13            | 38                                | 153   | 1         | 0.085          | 0.333        | <0.001 |
| * | Cholinergic synapse                 | 12            | 22                                | 95    | 1         | 0.126          | 0.358        | <0.001 |
| * | Circadian entrainment               | 8             | 48                                | 96    | 1         | 0.083          | 0.583        | <0.001 |
| * | Circadian rhythm                    | 9             | 0                                 | 31    | 1         | 0.290          | 0.290        | 0.001  |
| * | Cocaine addiction                   | 17            | 7                                 | 42    | 1         | 0.405          | 0.571        | <0.001 |
| * | Dopaminergic synapse                | 36            | 23                                | 124   | 1         | 0.290          | 0.476        | <0.001 |
| * | Estrogen signaling pathway          | 11            | 20                                | 87    | 1         | 0.126          | 0.356        | <0.001 |
| * | Glucagon signaling pathway          | 25            | 21                                | 85    | 1         | 0.294          | 0.541        | <0.001 |
|   | Hepatitis B                         | 21            | 59                                | 132   | 3         | 0.159          | 0.606        | <0.001 |
| * | HTLV-I infection                    | 73            | 35                                | 190   | 10        | 0.384          | 0.568        | <0.001 |
| * | Insulin resistance                  | 22            | 50                                | 92    | 1         | 0.239          | 0.783        | <0.001 |
| * | Insulin secretion                   | 32            | 4                                 | 53    | 2         | 0.604          | 0.679        | <0.001 |
|   | Melanogenesis                       | 17            | 22                                | 100   | 2         | 0.170          | 0.390        | <0.001 |
| * | Osteoclast differentiation          | 22            | 27                                | 118   | 2         | 0.186          | 0.415        | <0.001 |
| * | Prostate cancer                     | 46            | 16                                | 85    | 1         | 0.541          | 0.729        | <0.001 |
| * | Renin secretion                     | 1             | 6                                 | 50    | 4         | 0.020          | 0.140        | 0.001  |
| * | Thyroid hormone synthesis           | 26            | 11                                | 46    | 2         | 0.565          | 0.804        | <0.001 |
| * | TNF signaling pathway               | 16            | 17                                | 70    | 1         | 0.229          | 0.471        | <0.001 |
| * | Tuberculosis                        | 26            | 50                                | 173   | 4         | 0.150          | 0.439        | <0.001 |
| * | Vasopressin-regulated water ...     | 14            | 1                                 | 22    | 2         | 0.636          | 0.682        | <0.001 |
