# Supplementary material for: SourceSet: A graphical model approach to identify primary genes in perturbed biological pathways
Source: PubMed Central journal article supplement (PMC6834292; doi:10.1371/journal.pcbi.1007357), 2019-10-25
Supplement: pcbi.1007357.s016.pdf [file pcbi.1007357.s016.pdf]

|    |                                | $ \hat{D}_G $ | $ \hat{D}_G \setminus \hat{D}_G $ | $ V $ | n.cluster | primary impact | total impact | pvalue |
|----|--------------------------------|---------------|-----------------------------------|-------|-----------|----------------|--------------|--------|
|    | Axon guidance                  | 0             | 44                                | 126   | 2         | 0.000          | 0.349        | 0.016  |
| ★  | Cell cycle                     | 16            | 10                                | 111   | 1         | 0.144          | 0.234        | 0.011  |
| ★★ | Chronic myeloid leukemia       | 2             | 30                                | 67    | 3         | 0.030          | 0.478        | 0.016  |
| ★  | ErbB signaling pathway         | 3             | 9                                 | 78    | 1         | 0.038          | 0.154        | 0.067  |
| ★  | Neurotrophin signaling pathway | 4             | 8                                 | 98    | 2         | 0.041          | 0.122        | 0.014  |
| ★★ | Pathways in cancer             | 3             | 50                                | 263   | 4         | 0.011          | 0.202        | 0.003  |
| ★  | Viral myocarditis              | 8             | 5                                 | 25    | 6         | 0.320          | 0.520        | <0.001 |
