# Supplementary material for: SourceSet: A graphical model approach to identify primary genes in perturbed biological pathways
Source: PubMed Central journal article supplement (PMC6834292; doi:10.1371/journal.pcbi.1007357), 2019-10-25
Supplement: pcbi.1007357.s017.pdf [file pcbi.1007357.s017.pdf]

| Symbol | n.primary | n.secondary | n.graph | score | relevance |
|--------|-----------|-------------|---------|-------|-----------|
| RAF1   | 17        | 42          | 57      | 1.602 | 0.069     |
| ARAF   | 17        | 26          | 27      | 2.564 | 0.069     |
| STAT3  | 12        | 20          | 20      | 2.174 | 0.048     |
| TP53   | 9         | 24          | 28      | 1.833 | 0.036     |
| MAP2K1 | 7         | 38          | 63      | 1.588 | 0.028     |
