# Supplementary material for: SourceSet: A graphical model approach to identify primary genes in perturbed biological pathways
Source: PubMed Central journal article supplement (PMC6834292; doi:10.1371/journal.pcbi.1007357), 2019-10-25
Supplement: pcbi.1007357.s018.pdf [file pcbi.1007357.s018.pdf]

|                                  | $ \hat{D}_G $ | $ \hat{D}_G \setminus \hat{D}_G $ | $ V $ | n.cluster | primary impact | total impact | pvalue |
|----------------------------------|---------------|-----------------------------------|-------|-----------|----------------|--------------|--------|
| Mucin type O-glycan biosynthesis | 15            | 1                                 | 16    | 1         | 0.938          | 1.000        | <0.001 |
| Bile secretion                   | 8             | 0                                 | 11    | 2         | 0.727          | 0.727        | 0.015  |
| Ether lipid metabolism           | 14            | 6                                 | 21    | 1         | 0.667          | 0.952        | 0.013  |
| Steroid hormone biosynthesis     | 11            | 3                                 | 17    | 2         | 0.647          | 0.824        | <0.001 |
| Tyrosine metabolism              | 8             | 0                                 | 14    | 2         | 0.571          | 0.571        | <0.001 |
| Sphingolipid metabolism          | 20            | 0                                 | 36    | 1         | 0.556          | 0.556        | 0.010  |
| beta-Alanine metabolism          | 12            | 2                                 | 22    | 2         | 0.545          | 0.636        | <0.001 |
| Retinol metabolism               | 8             | 6                                 | 16    | 1         | 0.500          | 0.875        | <0.001 |
| Primary bile acid biosynthesis   | 3             | 0                                 | 7     | 2         | 0.429          | 0.429        | 0.029  |
| Vibrio cholerae infection        | 5             | 2                                 | 12    | 3         | 0.417          | 0.583        | <0.001 |
