# Supplementary material for: SourceSet: A graphical model approach to identify primary genes in perturbed biological pathways
Source: PubMed Central journal article supplement (PMC6834292; doi:10.1371/journal.pcbi.1007357), 2019-10-25
Supplement: pcbi.1007357.s019.pdf [file pcbi.1007357.s019.pdf]

| Symbol  | n.primary | n.secondary | n.graph | score | relevance |
|---------|-----------|-------------|---------|-------|-----------|
| HSD17B6 | 2         | 0           | 2       | 5.059 | 0.0081    |
| GHR     | 2         | 0           | 2       | 4.025 | 0.0081    |
| GRIA2   | 6         | 1           | 7       | 3.734 | 0.0242    |
| HLA-DMB | 4         | 0           | 5       | 3.562 | 0.0161    |
| COMT    | 2         | 0           | 2       | 3.506 | 0.0081    |
