# Supplementary material for: SourceSet: A graphical model approach to identify primary genes in perturbed biological pathways
Source: PubMed Central journal article supplement (PMC6834292; doi:10.1371/journal.pcbi.1007357), 2019-10-25
Supplement: pcbi.1007357.s020.pdf [file pcbi.1007357.s020.pdf]

|          | Mapggm      |               |               |
|----------|-------------|---------------|---------------|
|          | $n = 5$     | $n = 10$      | $n = 25$      |
| Weak     | 0.07 (0.37) | 0.10 (0.22)   | 0.22 (0.09)   |
| Mild     | 0.76 (0.20) | 0.98 (0.02)   | 1.00 (< 0.01) |
| Moderate | 0.93 (0.07) | 1.00 (< 0.01) | 1.00 (< 0.01) |
| Strong   | 0.97 (0.03) | 1.00 (< 0.01) | 1.00 (< 0.01) |
